# Supplementary material
Source: PubMed Central journal article supplement (PMC7223504)
Supplement: 41587_2019_374_MOESM1_ESM.pdf [file 41587_2019_374_MOESM1_ESM.pdf]

In the format provided by the authors and unedited.

# An integrated perfusion machine preserves injured human livers for 1 week

**Dilmurodjon Eshmuminov** <sup>1,2,6</sup>, **Dustin Becker**<sup>2,3,6</sup>, **Lucia Bautista Borrego** <sup>1,2</sup>, **Max Hefti** <sup>2,3</sup>,  
**Martin J. Schuler**<sup>2,3</sup>, **Catherine Hagedorn**<sup>1,2</sup>, **Xavier Muller**<sup>1,2</sup>, **Matteo Mueller**<sup>1,2</sup>, **Christopher Onder**<sup>2,4</sup>,  
**Rolf Graf**<sup>1,2</sup>, **Achim Weber** <sup>5</sup>, **Philipp Dutkowski**<sup>1,2</sup>, **Philipp Rudolf von Rohr**<sup>2,3,7</sup> and  
**Pierre-Alain Clavien** <sup>1,2,7\*</sup>

<sup>1</sup>Department of Surgery and Transplantation, Swiss Hepato-Pancreato-Biliary (HPB) Center, University Hospital Zurich, Zurich, Switzerland.

<sup>2</sup>Wyss Zurich, ETH Zurich and University of Zurich, Zurich, Switzerland. <sup>3</sup>Transport Processes and Reactions Laboratory, Department of Mechanical and Process Engineering, ETH Zurich, Zurich, Switzerland. <sup>4</sup>Institute for Dynamic Systems and Control, Department of Mechanical and Process Engineering, ETH Zurich, Zurich, Switzerland. <sup>5</sup>Department of Pathology and Molecular Pathology, and Institute of Molecular Cancer Research (IMCR), University Zurich and University Hospital Zurich, Zurich, Switzerland. <sup>6</sup>These authors contributed equally: Dilmurodjon Eshmuminov, Dustin Becker.

<sup>7</sup>These authors jointly supervised this work: Philipp Rudolf von Rohr, Pierre-Alain Clavien. \*e-mail: [clavien@access.uzh.ch](mailto:clavien@access.uzh.ch)

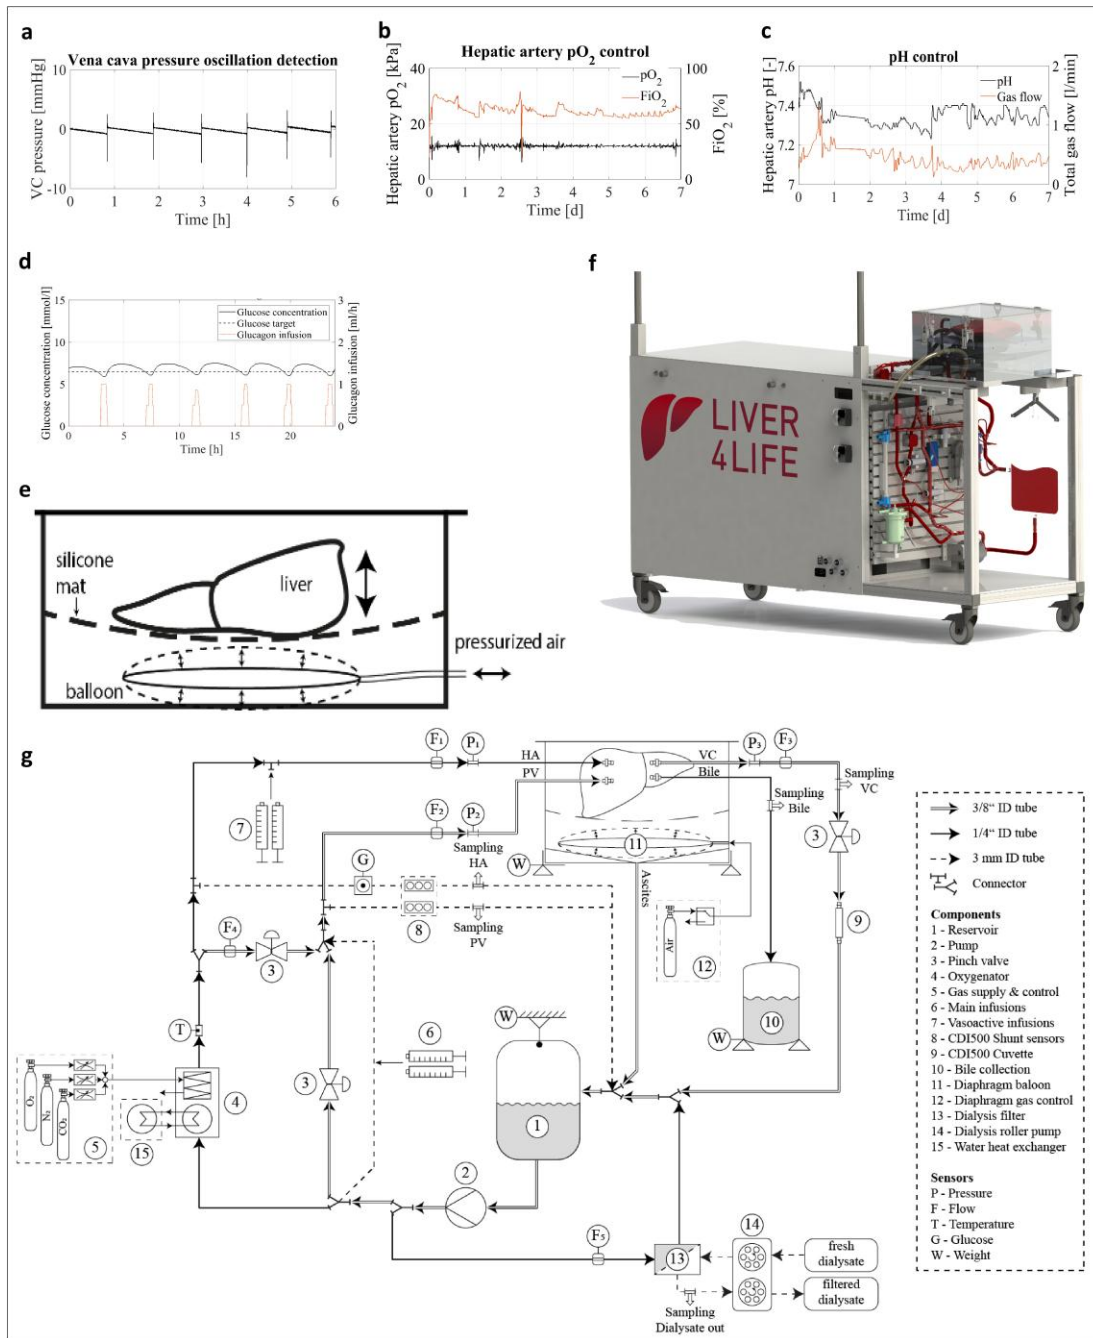

**Supplementary Figure 1**

**Machine specifications.**

**a**, A representative graphic showing the continuous reduction of the caval pressure until the fluctuation point (pressure  $<0$  mmHg) is reached. After detection of the fluctuation point, the vena cava (VC) target pressure is raised by 1 mmHg. For further details please refer to the Methods. **b**, Representative illustration of the  $pO_2$  control, where the system automatically adapts  $FiO_2$  of the gas supply to keep a targeted  $pO_2$  in the hepatic artery (HA). **c**, Representative illustration of the control system adjusting the wash-out rate of  $CO_2$  from the perfusate and thereby, controlling the pH. **d**, Representative illustration of the automated glucagon infusion. The glucagon supply is integrated as a safety feature to prevent severe hypoglycemia. Glucagon is injected, if the desired glucose level is undershot after spontaneous glucose level recovery was not sufficient. **e**, Illustration of periodic liver movement with pressurized air. **f**, Illustration of the current mobile laboratory prototype with internal gas and power supply. Liver4Life refers to the name of our research group. **g**, Detailed schematics of the perfusion loop. The functions of the integrated components were described in the Methods of the manuscript.

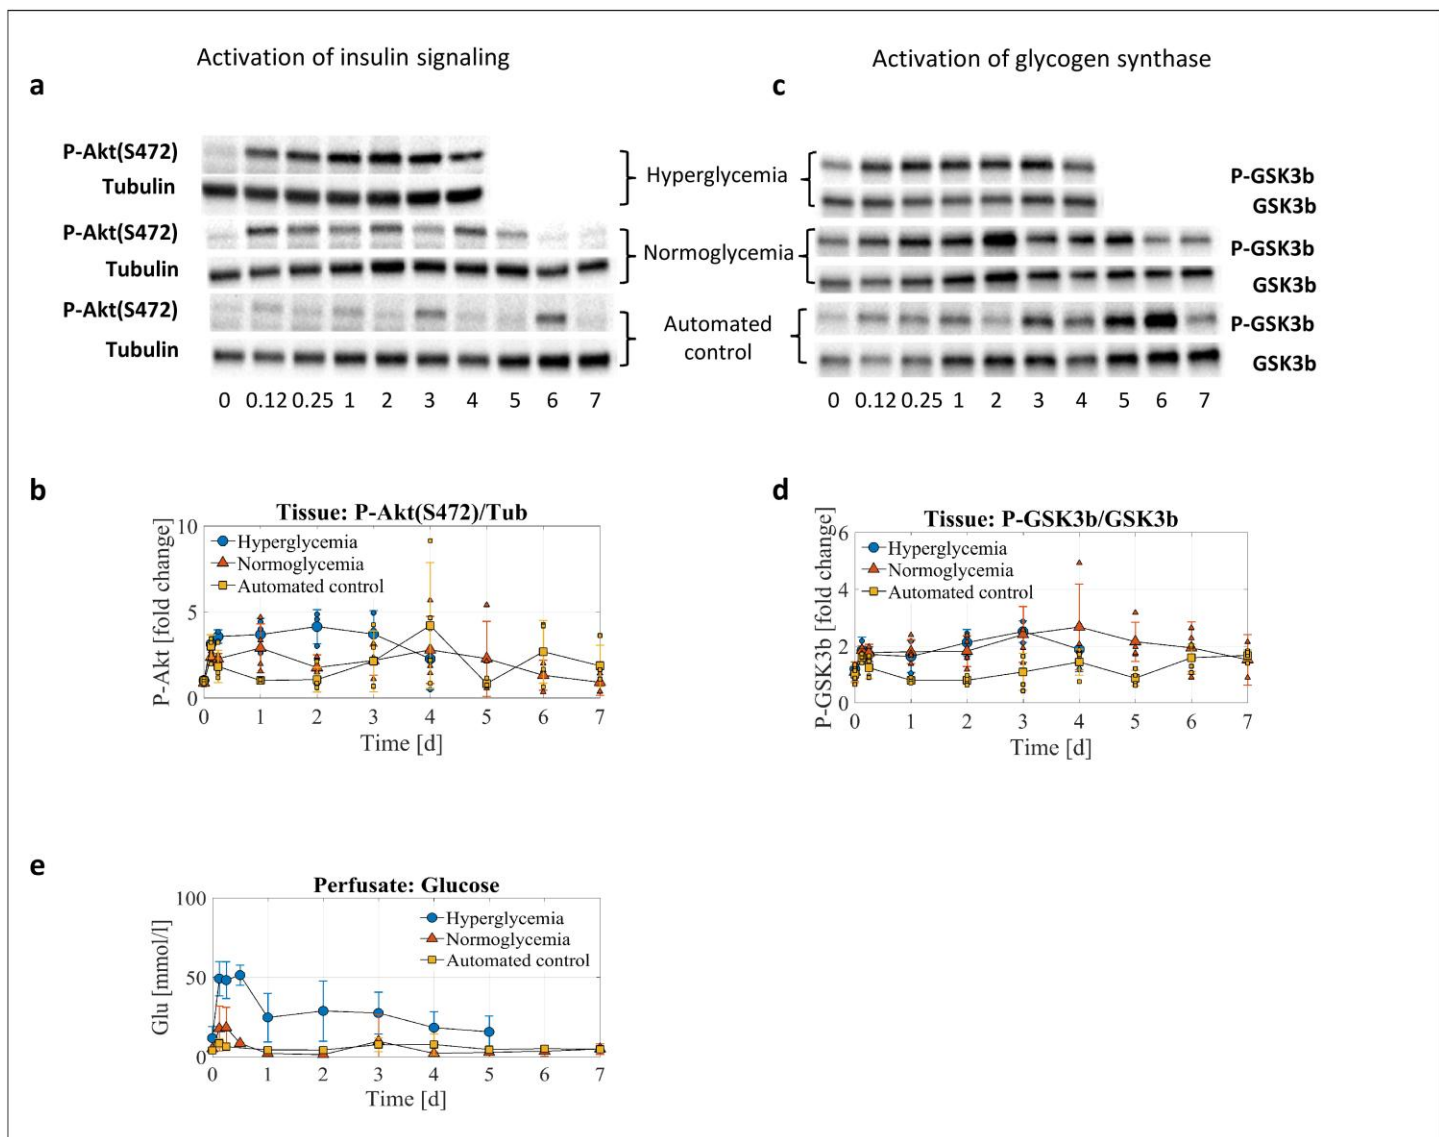

**Supplementary Figure 2**

### Glucose metabolism in pig livers

The activation of insulin signaling pathway during perfusion for the “hyperglycemic” (n=4 pig livers), “normoglycemic” (n=4 pig livers) and “automated control” (n=4 pig livers) groups. **a-b**, Insulin induces phosphorylation of Akt and an activation of its signaling pathway. **a**, P-Akt Western blot analysis and **b**, quantification. **c-d**, Glycogen synthase activation depending on insulin application in each study group. P-Akt induces phosphorylation and inactivation of GSK3b, leading to the activation of glycogen synthase. **c**, P-GSK3b Western blot analysis and **d**, quantification. **e**, Glucose level during perfusion for every study group. (hyperglycemic, normoglycemic, automated control). Data reported as mean  $\pm$  s.d.

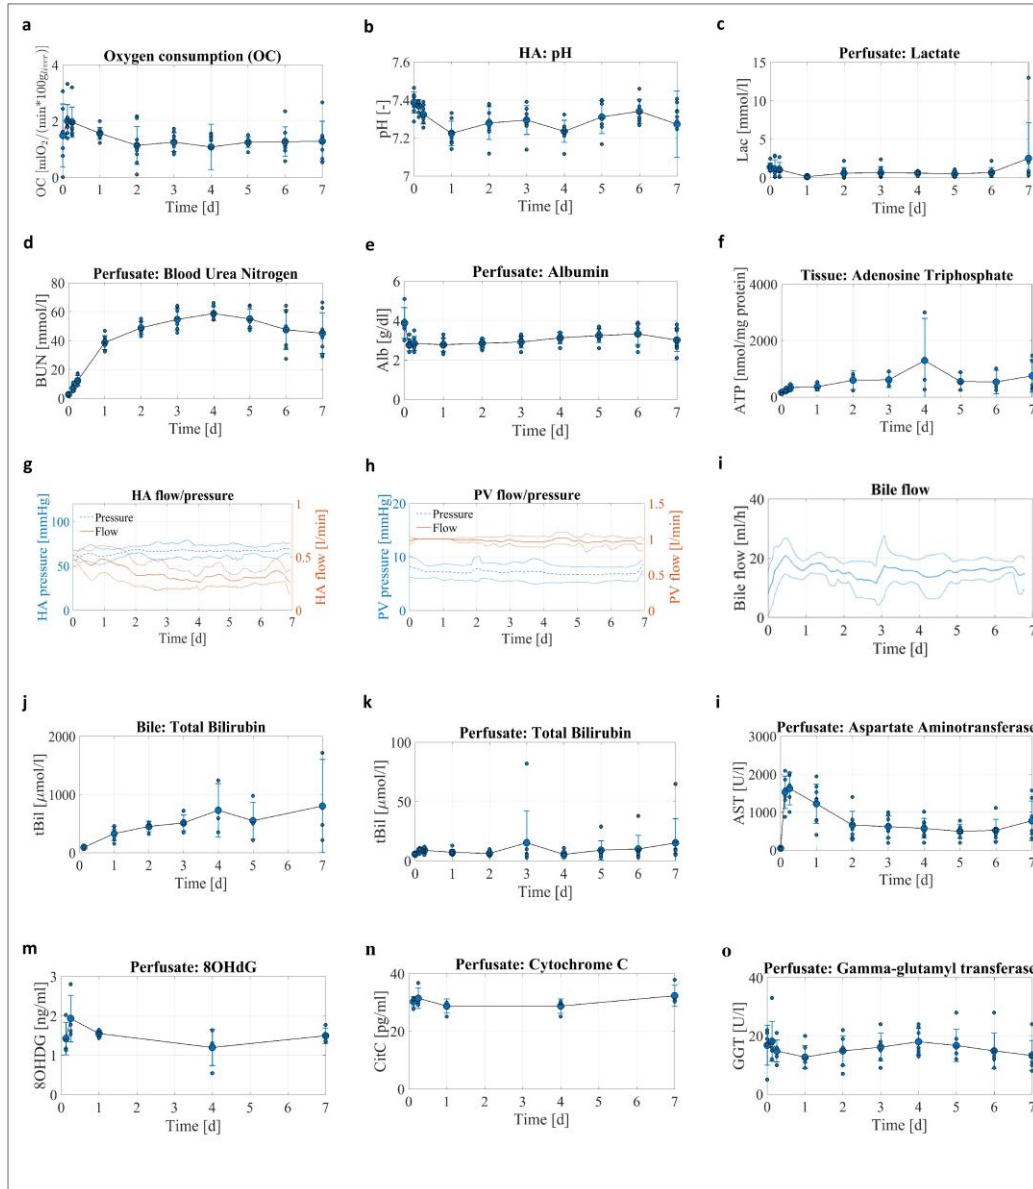

**Supplementary Figure 3**

**Pig liver performance during 7 days *ex vivo* perfusion (n=8 pig livers).**

n=8 pig livers for measurements in perfusate and n=5 pig livers for measurements in tissue. Livers with the intention to transplant (n=3 pig livers) were not biopsied on a daily basis during perfusion to prevent bleeding after transplantation.

**a, b**, Oxygen consumption and pH: Perfused pig livers consumed a substantial amounts of oxygen (**a**) and maintained mean pH >7.2 (**b**). **c**, Lactate clearance: Compared to the perfusion of human livers with a high lactate at start caused by the packed blood products, the pig blood was collected freshly with a minimal storage time. Thus, lactate was less than 2 mmol/l at perfusion start. **d, e, f**, Synthetic functions: Perfused livers produced blood urea nitrogen (BUN) (**d**) and maintained albumin within physiologic levels (**e**). ATP synthesis in tissue shown as a parameter of maintenance of cell energy (**f**). **g**, Flow and pressure in the hepatic artery (HA). **h**, Flow and pressure in the portal vein (PV). **i**, Continuous bile flow was present in all of the eight pig livers. **j, k** Total bilirubin level in bile (**j**) and blood (**k**). **l, m, n, o**, Injury markers: The initially increased injury marker AST declined during perfusion (**l**). 8-Hydroxydesoxyguanosin (8OHdG)(n=5) presented as an injury marker for DNA (**m**) and Cytochrome C representing an injury marker for mitochondria (**n**), (n=5). **o**, One week course of Gamma-glutamyl transferase. Data reported as mean ± s.d.

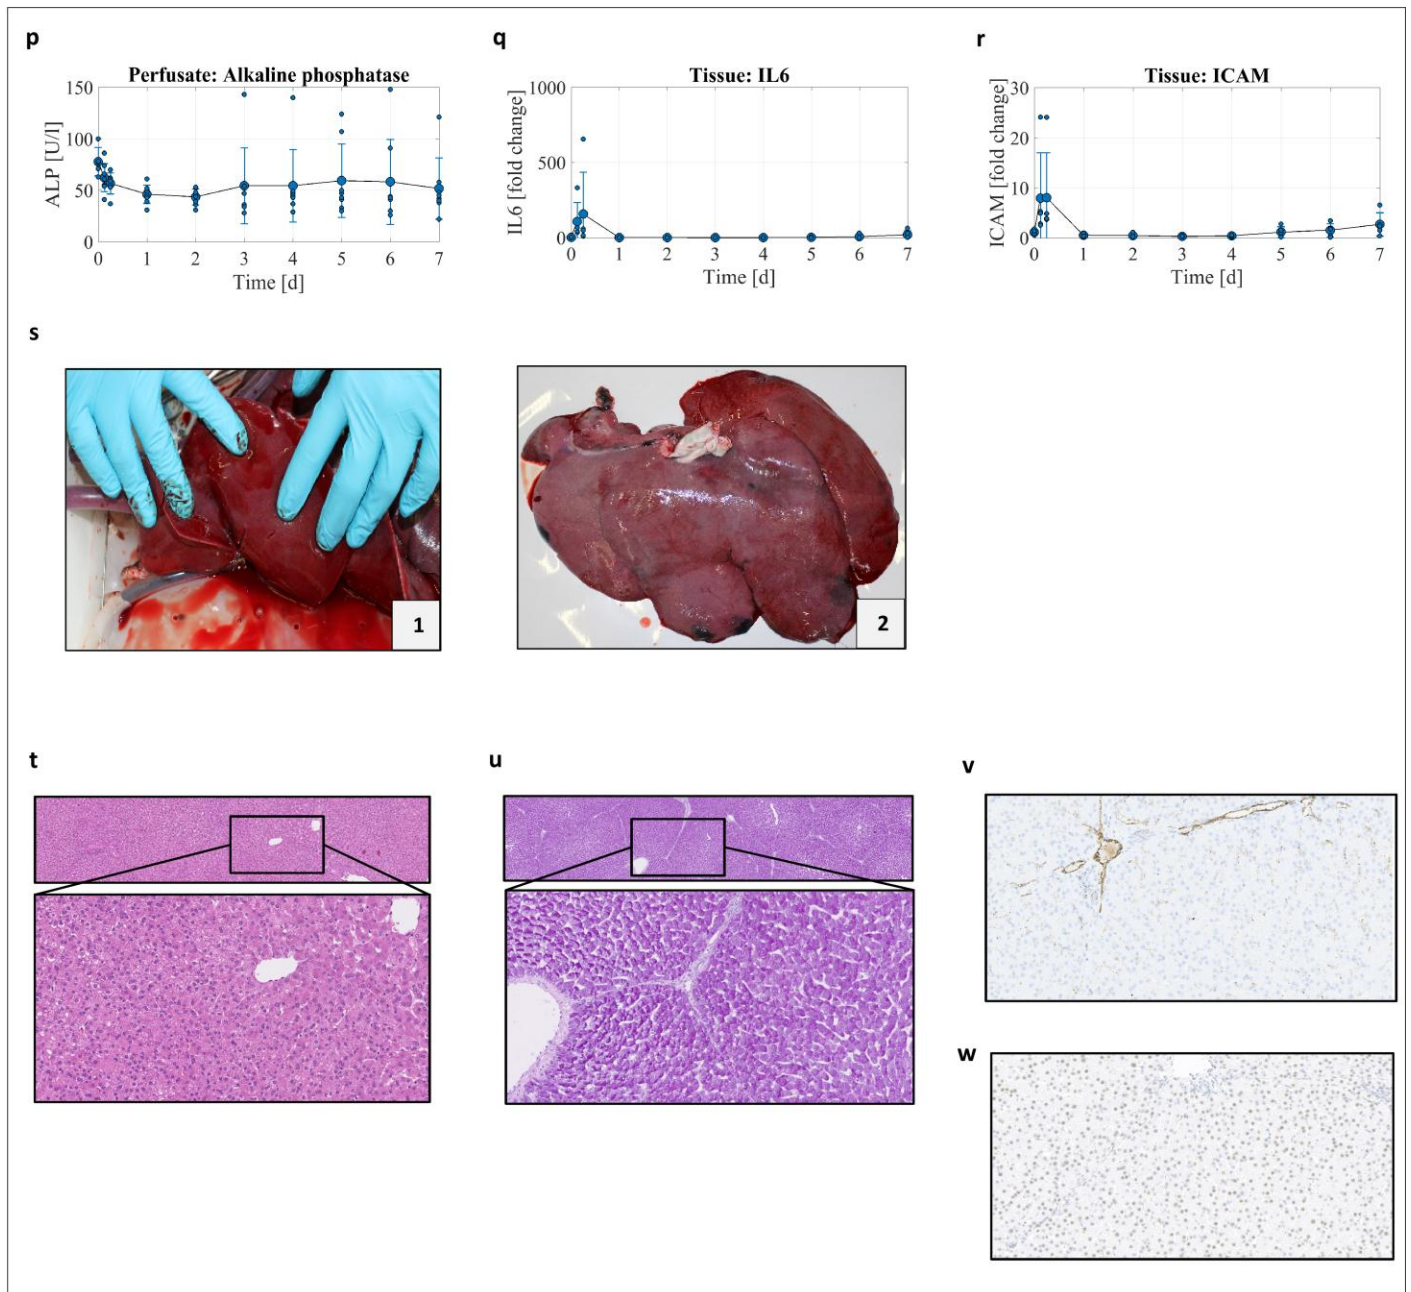

**Supplementary Figure 4**

**Pig liver performance during 7 days ex vivo perfusion (n=8 livers).**

n=8 pig livers for measurements in perfusate and n=5 pig livers for measurements in tissue. Livers with the intention to transplant (n=3 pig livers) were not biopsied on a daily basis during perfusion to prevent bleeding after transplantation.

**p**, Cholestasis marker alkaline phosphatase (ALP) remained low in the perfusate during 7 days. **q**, Inflammation marker IL-6 in tissue illustrated as fold change at mRNA level. **r**, Intercellular adhesion molecule 1 (ICAM-1) as a marker of endothelial cell activation shown as fold change at mRNA level in tissue. **s**, Representative macroscopic view on day 7 of perfusion with the contact areas presented (1) and shortly after termination of perfusion (2). Dark areas correspond to biopsy spots during perfusion. **t**, **u**, **v**, **w**, Representative histology slides on day 7: Preserved liver integrity shown on H&E staining (**t**) with preserved glycogen seen on PAS staining (**u**) (slides shown in 5x and 20x magnification). **v**, Endothelial cells were not activated as shown with von Willebrand immunohistochemistry staining (20x magnification). Caspase 3 staining showing the absence of relevant cell apoptosis on day 7. Data reported as mean  $\pm$  s.d.



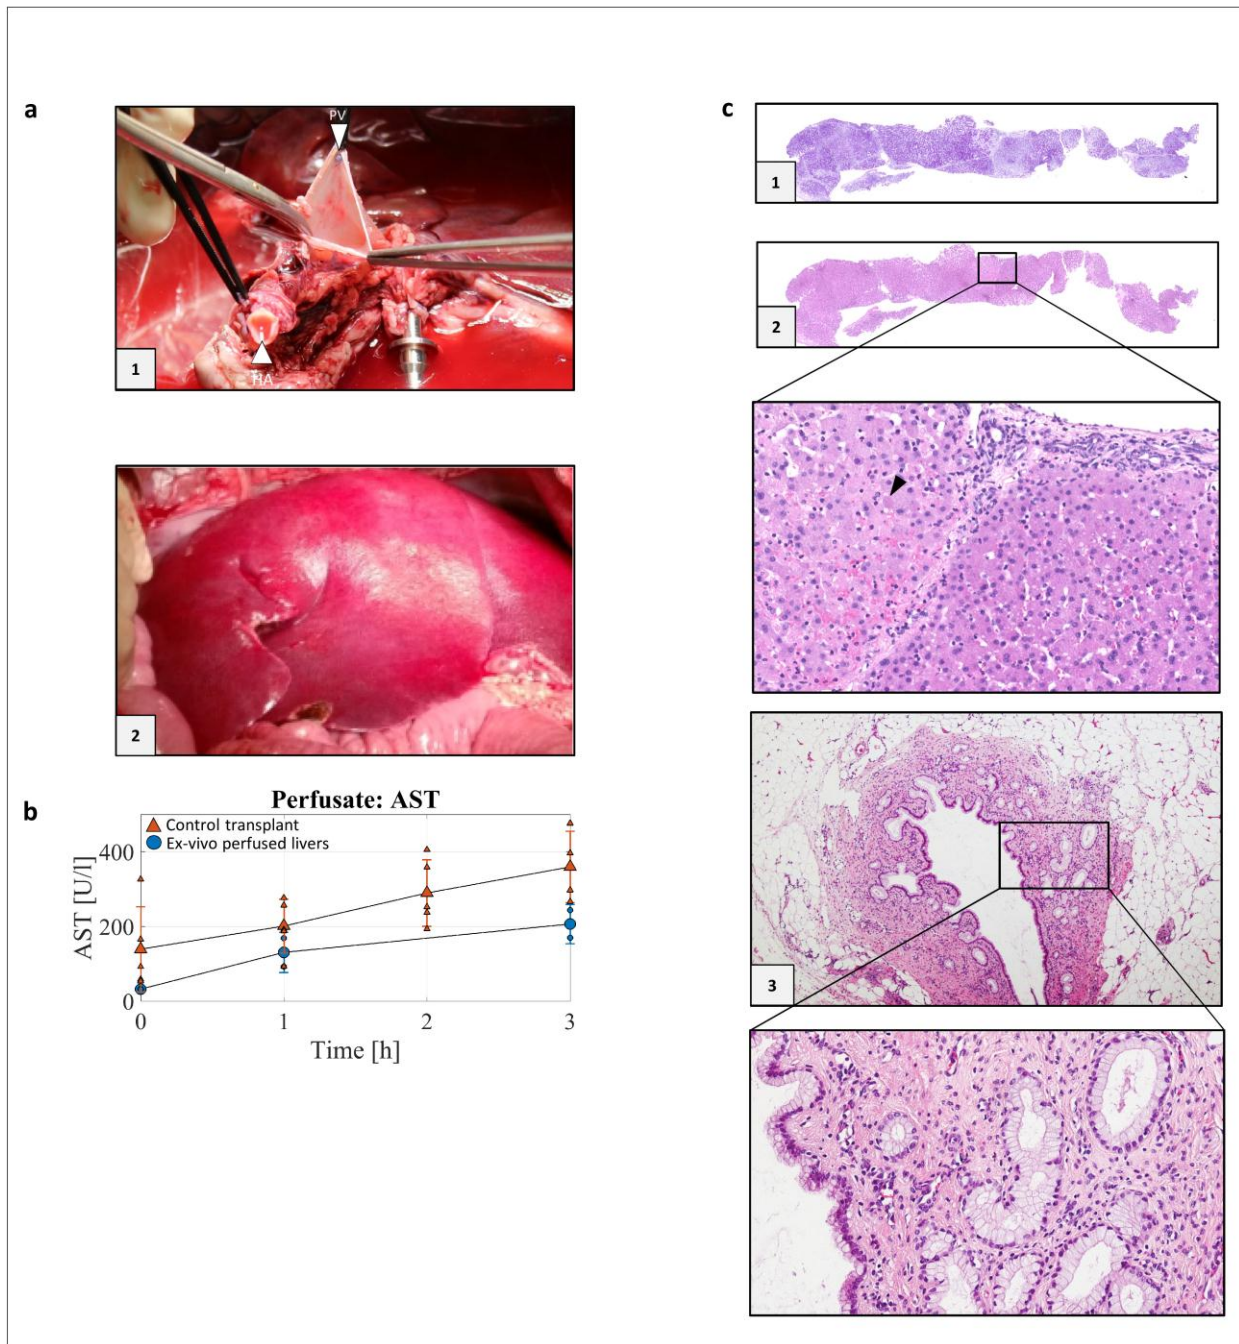

**Supplementary Figure 5**

**Pig liver transplantation after 7 days of ex-vivo perfusion (n=3 pig livers after ex vivo perfusion, n=5 pigs as control after standard cold storage). Representative images and histology were shown only for ex vivo perfused livers.**

**a**, Representative macroscopic view: The portal vein (PV) and hepatic artery (HA) during back-table preparation after ex vivo perfusion (1). Liver after reperfusion (2). **b**, AST release during the first 3 post-transplant hours (n=3) compared to control transplants without ex vivo perfusion (n=5). **c**, Representative core needle biopsies at 3 hours of reperfusion showing retained glycogen storages on PAS staining (1) and preserved liver architecture on H&E staining (2). Higher magnification (20x) shows vital hepatocytes but with few apoptotic cells (arrow). Representative extrahepatic bile duct after reperfusion on H&E staining (5x and 20x magnification) showed a preserved epithelial lining and subepithelial glands on H&E staining (3). Data reported as mean  $\pm$  s.d.

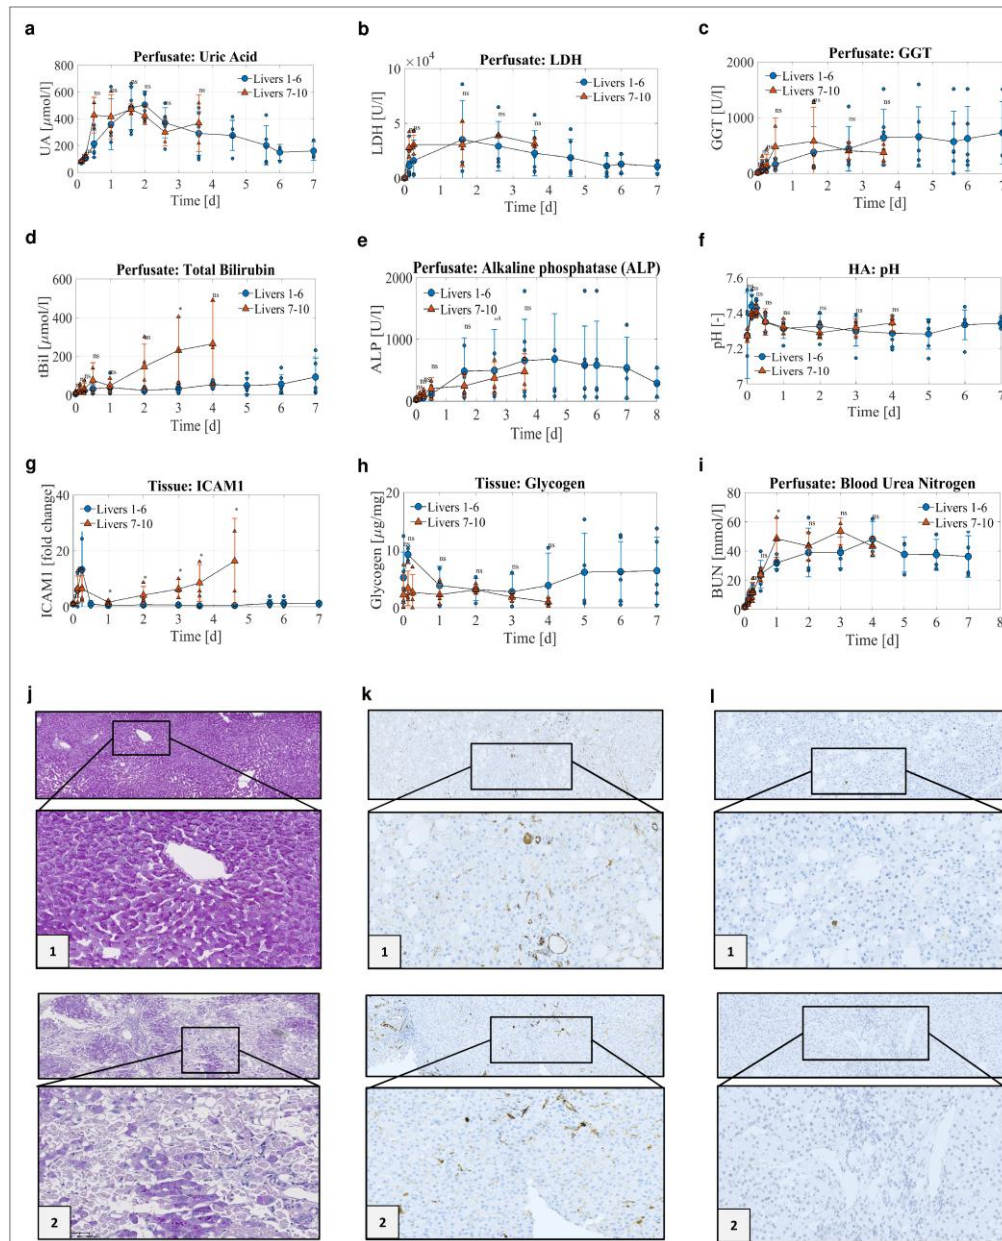

**Supplementary Figure 6**

**Performance of human livers during 7 days *ex vivo* perfusion (n=10 livers).**

Human livers 1-6 (blue line, n=6 livers), human livers 7-10 (red line, n=4 livers). **a, b, c, d**, Injury marker release into perfusate shown for uric acid (UA) (**a**), lactate dehydrogenase LDH (**b**), gamma-glutamyl transferase (GGT) (**c**) and total bilirubin (**d**). Increase of GGT and total bilirubin was observed with some delay, similar to the clinical setting. **e**, Course of Alkaline phosphatase level in perfusate. **f**, pH maintenance in both groups without significant difference. **g**, ICAM-1 course shown as fold change at mRNA level in tissue. **h**, Glycogen amount in tissue measured chemically. **i**, Blood urea nitrogen (BUN) level in perfusate. **j, k, l**, Representative histology slides at the end of the experiment. (Slides shown in 5x and 20x magnification): preserved glycogen stores on PAS staining in livers 1-6 (**j1**). Scattered loss of tissue glycogen in necrotic areas of livers 7-10. (**j2**). Endothelial cells were not activated as shown with von Willebrand immunohistochemistry staining (livers 1-6 **k1**, livers 7-10 **k2**). Caspase 3 staining showing the absence of relevant cell -apoptosis on day 7 (livers 1-6 **l1**, livers 7-10 **l2**). Data reported as mean  $\pm$  s.d.. P-value  $^* < 0.05$ ,  $^{**} < 0.01$ ,  $^{***} < 0.001$ . ns, not significant. For comparison of two groups two-tailed Student's t-test was used. Exact P values were provided in the Supplementary Table 3 for p values.

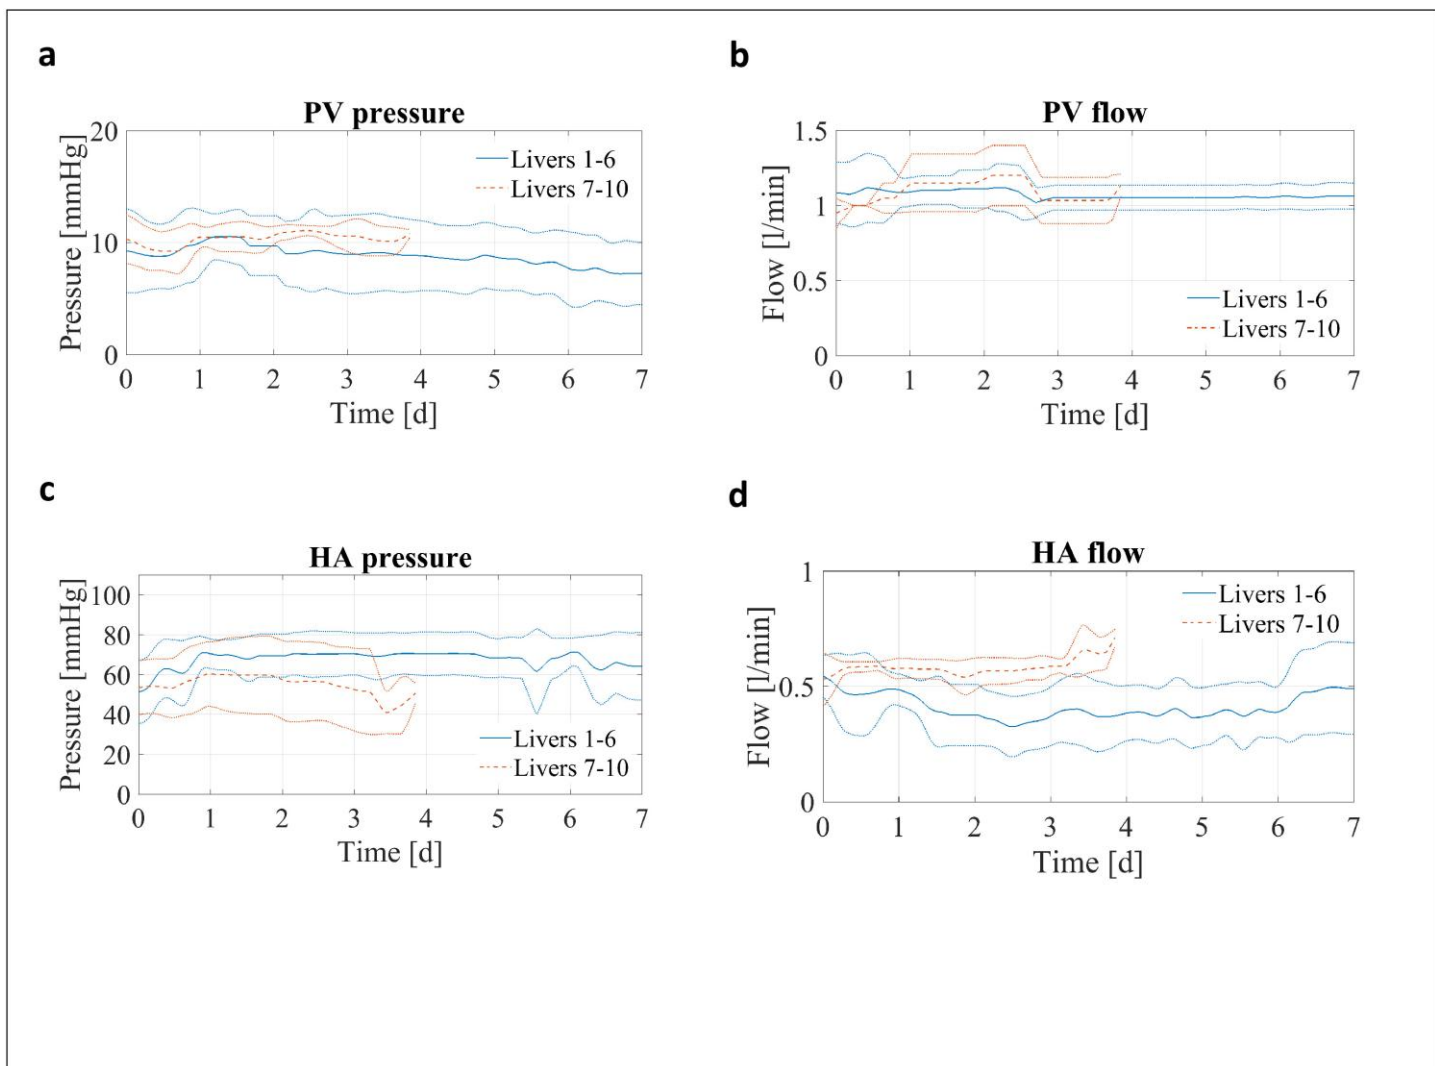

**Supplementary Figure 7**

**Flow and pressure during one week perfusion of human livers (n=10 livers).**

Human livers 1-6 (blue line, n=6 livers), human livers 7-10 (red line, n=4 livers). **a, b**, Pressure and flow in the portal vein (PV). **c, d**, Pressure and flow in the hepatic artery (HA). Data reported as mean  $\pm$  s.d.. Livers 1-6: solid blue lines for mean value, dotted blue lines for s.d.. Livers 7-10: dashed red lines for mean value, dotted red lines for s.d.



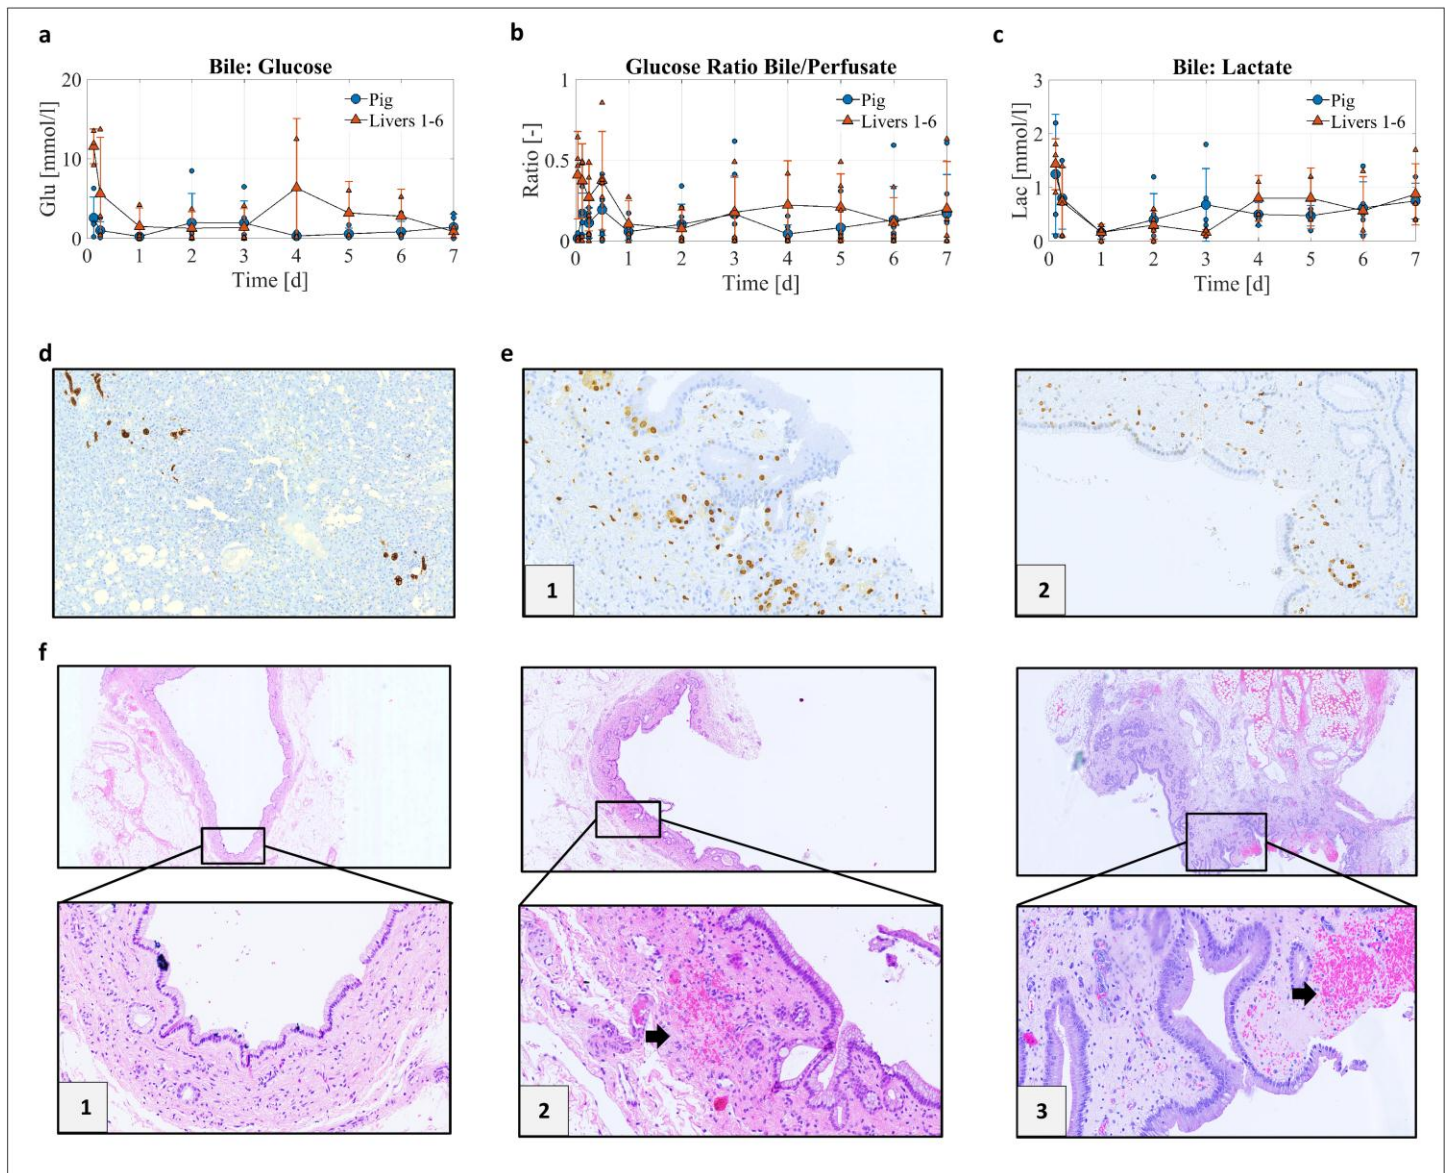

**Supplementary Figure 8**

**Bile duct viability in injured human livers (n=10) and healthy pig livers (n=8) during one week of perfusion.**

Human livers 1-6 (red line, n=6 livers), pig livers blue line (n=5 livers). **a**, Glucose level in bile. **b**, Bile/perfusate glucose ratio  $\leq 0.7$  has been recommended as a reliable viability sign. During perfusion the mean ratio was  $< 0.5$ . pH of the bile was not reported due to contact of bile with ambient air during collection. **c**, Lactate content of bile during perfusion. **d**, Intrahepatic bile ductuli shown with a staining for CK7 without signs of cholestasis in a human liver (10x magnification) in livers 1-6 (n=6 livers). Of note, human livers with cirrhosis or fibrosis showed bile duct metaplasia at perfusion start related to the primary liver disease. **e**, **f** Extrahepatic bile ducts from three representative experiments on day 7. The biopsy samples were taken close to the point, where the cannulas had been attached. **e 1 and 2**, Ki-67 immunohistochemistry staining demonstrated mitotic activity in extrahepatic bile ducts. **f 1, 2, 3**, Extrahepatic bile ducts disclosed some hemorrhagic changes of the surrounding soft tissue (black arrows) with less than 50% epithelial denudation and preserved submucosal glands on H&E staining. (Slides presented in 5x magnification and 20x magnification). Data reported as mean  $\pm$  s.d.

|                                                                                   | Seven days perfusion |                      |           |           |                      |             | Four days perfusion  |               |                      |                      |
|-----------------------------------------------------------------------------------|----------------------|----------------------|-----------|-----------|----------------------|-------------|----------------------|---------------|----------------------|----------------------|
|                                                                                   | 1                    | 2                    | 3         | 4         | 5                    | 6           | 7                    | 8             | 9                    | 10                   |
| <b>Livers</b>                                                                     |                      |                      |           |           |                      |             |                      |               |                      |                      |
| <b>Donor age</b>                                                                  | 48                   | 81                   | 73        | 54        | 31                   | 78          | 43                   | 70            | 53                   | 69                   |
| <b>BMI (kg/m<sup>2</sup>)</b>                                                     | 23                   | 28                   | 26        | 52        | 37                   | 36          | 26                   | 26            | 26                   | 27                   |
| <b>Cause of death</b>                                                             | CVA                  | Trauma               | CVA       | CVA       | Anoxia               | Anoxia      | Anoxia               | Trauma        | CVA                  | CVA                  |
| <b>DBD/DCD</b>                                                                    | DBD                  | DCD                  | DBD       | DBD       | DCD                  | DCD         | DCD                  | DCD           | DCD                  | DCD                  |
| <b>ICU stay (day)</b>                                                             | 17                   | 6                    | 18        | 2         | 5                    | 9           | 21                   | 6             | 11                   | 1                    |
| <b>Peak ALT/AST</b>                                                               | 82/121               | 80/89                | 133/196   | 26/35     | 385/481              | 61/31       | 3579/8882            | 236/490       | 70/69                | 12/20                |
| <b>Peak sodium &gt;165 mmol/l</b>                                                 | No                   | No                   | No        | No        | No                   | No          | No                   | No            | No                   | No                   |
| <b>Peak bilirubin &gt;3 mg/dl</b>                                                 | No                   | No                   | No        | No        | No                   | No          | Yes                  | No            | No                   | No                   |
| <b>Histology at start</b>                                                         |                      |                      |           |           |                      |             |                      |               |                      |                      |
| - Macro steatosis                                                                 | <5%                  | <5%                  | <5%       | 25%       | 50%                  | <5%         | <5%                  | <5%           | <5%                  | 10%                  |
| - Fibrosis grade                                                                  | 3                    | 0                    | 4         | 2         | 0                    | 0           | 0                    | 0             | 0                    | 0                    |
| - Inflammatory infiltrates                                                        | yes                  | no                   | no        | yes       | no                   | no          | yes                  | no            | no                   | no                   |
| <b>Functional WI (min)</b>                                                        | n.a.                 | 26                   | n.a.      | n.a.      | 30                   | 19          | 36                   | 25            | 20                   | 29                   |
| <b>Asystolic WI (min)</b>                                                         | n.a.                 | 19                   | n.a.      | n.a.      | 20                   | 14          | 23                   | 16            | 15                   | 15                   |
| <b>Total cold storage (min)</b>                                                   | 360                  | 572                  | 360       | 330       | 597                  | 510         | 496                  | 250           | 280                  | 643                  |
| <b>HOPE</b>                                                                       | No                   | Yes                  | No        | No        | Yes                  | Yes         | Yes                  | No            | Yes                  | Yes                  |
| <b>Assessment of mitochondrial injury (complex I fragments during HOPE )(1-3)</b> | -                    | high risk            | -         | -         | high risk            |             | high risk            | -             | high risk            | high risk            |
| <b>Donor risk index</b>                                                           | 1.4                  | 2.53                 | 2.12      | 1.52      | 1.73                 | 2.69        | 2.12                 | 2.5           | 2.3                  | 2.92                 |
| <b>Reason for declining</b>                                                       | fibrosis             | mitochondrial injury | cirrhosis | fibrosis  | mitochondrial injury | Amyloidosis | mitochondrial injury | poor flushout | mitochondrial injury | mitochondrial injury |
| <b>Liver weight start/end (kg)</b>                                                | 2.1 / 1.5            | 1.8 / 1.1            | 2.3 / 1.6 | 2.5 / 1.8 | 3.2 / 2.1            | 1.8 / 1.3   | 1.8 / 1.5            | 1.5 / 1.3     | 1.6 / -              | 2.6 / -              |

#### Supplementary Table 1. Human liver details

Targeted perfusion duration was 7 days. Livers 1-6 were perfused for targeted one week. Ongoing cell death with signs of liver failure were the reason for abortion of the perfusion within 4 days in livers 7-10. Hypothermic oxygenated perfusion (HOPE), cerebrovascular accident (CVA), donation after circulatory death (DCD), donation after brain death (DBD), Aspartate- and Alanine-Aminotransferase (AST, ALT).

- Muller X, Schlegel A, Kron P, Eshmuminov D, Wurdinger M, Meierhofer D, et al. Novel Real-time Prediction of Liver Graft Function During Hypothermic Oxygenated Machine Perfusion Before Liver Transplantation. *Ann Surg.* 2019;270(5):783-90.
- Chouchani ET, Pell VR, James AM, Work LM, Saeb-Parsy K, Frezza C, et al. A Unifying Mechanism for Mitochondrial Superoxide Production during Ischemia-Reperfusion Injury. *Cell Metab.* 2016;23(2):254-63.
- Murphy MP. How mitochondria produce reactive oxygen species. *Biochem J.* 2009;417(1):1-13.

| Perfusate preparation                                                |                                        |                                                                                                  |
|----------------------------------------------------------------------|----------------------------------------|--------------------------------------------------------------------------------------------------|
|                                                                      | Amount                                 | Comment                                                                                          |
| Conserved red blood cells                                            | ~ 1.4 liter                            | conserved erythrocytes have high lactate at delivery                                             |
| Fresh frozen plasma                                                  | ~ 0.8 liter                            | Add 5000 unit heparin                                                                            |
| Thrombocyte concentrate                                              | 1 unit                                 |                                                                                                  |
| Albumin 20 % solvent (Human Albumin)                                 | Usually 100 to 300 ml required         | Add to reach target albumin in perfusate >20g/l prior to perfusion start.                        |
| Dialysis                                                             |                                        |                                                                                                  |
|                                                                      | Rate                                   | Comment                                                                                          |
| Prior liver connection                                               | 1000-2000 ml/h                         | Correct pH (~7.2), normalise sodium, adjust hematocrit (target 27-30%)                           |
| During perfusion                                                     | 200 ml/h                               | Dialysate solution: multiBIC, Fresenius Medical Care                                             |
| Additives                                                            |                                        |                                                                                                  |
|                                                                      | Dose                                   | Comment                                                                                          |
| <i>Bolus infusions at perfusion start</i>                            |                                        |                                                                                                  |
| Piperacillin-Tazobactam (Sandoz)                                     | 2.2 g                                  |                                                                                                  |
| Solu-Medrol (Pfizer, Methylprednisolonum)                            | 500 mg                                 |                                                                                                  |
| Bicarbonates                                                         | -                                      | Add bicarbonates if pH< 7.0 with start of dialysis to correct pH.                                |
| <i>Constant infusions during perfusion</i>                           |                                        |                                                                                                  |
| Piperacillin-Tazobactam (Sandoz)                                     | 2.2g/24 h                              | Concentration: 2.2 g in 24 ml solvent.                                                           |
| Solu-Medrol (Pfizer, Methylprednisolonum)                            | 500 mg/24h                             | Concentration: 500 mg in 24 ml solvent                                                           |
| Heparin-NA (B. Braun Medical AG, Heparin)                            | Adjustable                             | Concentration: 1000 U/ml. Target active clotting time (ACT >300 s.)                              |
| Nutriflex special 70/240 (B. Braun Medical AG, Parenteral Nutrition) | 15 ml/h                                | Only amino acid bag (upper bag).                                                                 |
| Ursodeoxycholic acid (PCA, bile acid)                                | 3.4 g/24h                              | No glucose (do not open lower bag containing glucose).<br>Concentration: 3.4 g in 24 ml solvent. |
| <i>Controlled infusions</i>                                          |                                        |                                                                                                  |
| Actrapid (Novo Nordisk Pharma, Human insulin)                        | Automated to control perfusate glucose | Concentration: 0.45 U/ml                                                                         |
| GlucaGen, (Novo Nordisk Pharma, Glucagon)                            | Automated to control perfusate glucose | Concentration: 0.111 U/ml                                                                        |
| Neo-Synephrine HCL (Ospedalia AG, Phenylephrin)                      | Automated to control HA resistance     | Concentration: 0.4 mg/ml                                                                         |
| Flolan (GlaxoSmithKline, Epoprostinolium)                            | Automated to control HA resistance     | Concentration: 4 ug/ml                                                                           |

Supplementary Table 2. Perfusate constitute and additives for human liver perfusion
