# Supplementary material
Source: PubMed Central journal article supplement (PMC7223504)
Supplement: 41587_2019_374_MOESM2_ESM.pdf [file 41587_2019_374_MOESM2_ESM.pdf]

## Reporting Summary

Nature Research wishes to improve the reproducibility of the work that we publish. This form provides structure for consistency and transparency in reporting. For further information on Nature Research policies, see [Authors & Referees](#) and the [Editorial Policy Checklist](#).

### Statistics

For all statistical analyses, confirm that the following items are present in the figure legend, table legend, main text, or Methods section.

n/a Confirmed

- The exact sample size ( $n$ ) for each experimental group/condition, given as a discrete number and unit of measurement
- A statement on whether measurements were taken from distinct samples or whether the same sample was measured repeatedly
- The statistical test(s) used AND whether they are one- or two-sided  
*Only common tests should be described solely by name; describe more complex techniques in the Methods section.*
- A description of all covariates tested
- A description of any assumptions or corrections, such as tests of normality and adjustment for multiple comparisons
- A full description of the statistical parameters including central tendency (e.g. means) or other basic estimates (e.g. regression coefficient) AND variation (e.g. standard deviation) or associated estimates of uncertainty (e.g. confidence intervals)
- For null hypothesis testing, the test statistic (e.g.  $F$ ,  $t$ ,  $r$ ) with confidence intervals, effect sizes, degrees of freedom and  $P$  value noted  
*Give  $P$  values as exact values whenever suitable.*
- For Bayesian analysis, information on the choice of priors and Markov chain Monte Carlo settings
- For hierarchical and complex designs, identification of the appropriate level for tests and full reporting of outcomes
- Estimates of effect sizes (e.g. Cohen's  $d$ , Pearson's  $r$ ), indicating how they were calculated

*Our web collection on [statistics for biologists](#) contains articles on many of the points above.*

### Software and code

Policy information about [availability of computer code](#)

Data collection

Matlab (MathWorks, USA)

Data analysis

Matlab (MathWorks, USA)

For manuscripts utilizing custom algorithms or software that are central to the research but not yet described in published literature, software must be made available to editors/reviewers. We strongly encourage code deposition in a community repository (e.g. GitHub). See the Nature Research [guidelines for submitting code & software](#) for further information.

### Data

Policy information about [availability of data](#)

All manuscripts must include a [data availability statement](#). This statement should provide the following information, where applicable:

- Accession codes, unique identifiers, or web links for publicly available datasets
- A list of figures that have associated raw data
- A description of any restrictions on data availability

Request for data used in the manuscript should be addressed to corresponding author.

### Field-specific reporting

Please select the one below that is the best fit for your research. If you are not sure, read the appropriate sections before making your selection.

- Life sciences       Behavioural & social sciences       Ecological, evolutionary & environmental sciences

For a reference copy of the document with all sections, see [nature.com/documents/nr-reporting-summary-flat.pdf](https://nature.com/documents/nr-reporting-summary-flat.pdf)

## Life sciences study design

All studies must disclose on these points even when the disclosure is negative.

|                 |                                                                                                                                                                                                                                                                                             |
|-----------------|---------------------------------------------------------------------------------------------------------------------------------------------------------------------------------------------------------------------------------------------------------------------------------------------|
| Sample size     | <input type="text" value="No sample size calculation was performed in this study."/>                                                                                                                                                                                                        |
| Data exclusions | <input type="text" value="No data were excluded from the analysis"/>                                                                                                                                                                                                                        |
| Replication     | <input type="text" value="The current liver perfusion technology was the results of a 3-year intensive development with preclinical experiments performed in swine livers with reproducible results. The merit of perfusion technology was tested finally with ten injured human livers."/> |
| Randomization   | <input type="text" value="Randomization is not relevant in this study with 10 injured human livers declined for transplantation and pig livers demonstrate feasibility of long term perfusion."/>                                                                                           |
| Blinding        | <input type="text" value="Authors were not blinded to data collection and analysis, since the measured results were required to maintain the liver perfusion and interpretation of liver performance."/>                                                                                    |

## Reporting for specific materials, systems and methods

We require information from authors about some types of materials, experimental systems and methods used in many studies. Here, indicate whether each material, system or method listed is relevant to your study. If you are not sure if a list item applies to your research, read the appropriate section before selecting a response.

### Materials & experimental systems

|                                     |                                     |                             |
|-------------------------------------|-------------------------------------|-----------------------------|
| n/a                                 | <input type="checkbox"/>            | Involved in the study       |
| <input type="checkbox"/>            | <input checked="" type="checkbox"/> | Antibodies                  |
| <input checked="" type="checkbox"/> | <input type="checkbox"/>            | Eukaryotic cell lines       |
| <input checked="" type="checkbox"/> | <input type="checkbox"/>            | Palaeontology               |
| <input type="checkbox"/>            | <input checked="" type="checkbox"/> | Animals and other organisms |
| <input type="checkbox"/>            | <input checked="" type="checkbox"/> | Human research participants |
| <input checked="" type="checkbox"/> | <input type="checkbox"/>            | Clinical data               |

### Methods

|                                     |                          |                        |
|-------------------------------------|--------------------------|------------------------|
| n/a                                 | <input type="checkbox"/> | Involved in the study  |
| <input checked="" type="checkbox"/> | <input type="checkbox"/> | ChIP-seq               |
| <input checked="" type="checkbox"/> | <input type="checkbox"/> | Flow cytometry         |
| <input checked="" type="checkbox"/> | <input type="checkbox"/> | MRI-based neuroimaging |

## Antibodies

|                 |                                                              |
|-----------------|--------------------------------------------------------------|
| Antibodies used | <input type="text" value="Data provided in the manuscript"/> |
| Validation      | <input type="text" value="Data provided in the manuscript"/> |

## Animals and other organisms

Policy information about [studies involving animals](#); [ARRIVE guidelines](#) recommended for reporting animal research

|                         |                                                                                                                                                                                 |
|-------------------------|---------------------------------------------------------------------------------------------------------------------------------------------------------------------------------|
| Laboratory animals      | <input type="text" value="Female land race pigs"/>                                                                                                                              |
| Wild animals            | <input type="text" value="The study did not involve wild animals"/>                                                                                                             |
| Field-collected samples | <input type="text" value="The study did not involve samples collected from the field."/>                                                                                        |
| Ethics oversight        | <input type="text" value="The experiments were performed in accordance with the Swiss Animal Protection Law. The local animal welfare committee approved the study protocol."/> |

Note that full information on the approval of the study protocol must also be provided in the manuscript.

## Human research participants

Policy information about [studies involving human research participants](#)

|                            |                                                                                                                                                                                  |
|----------------------------|----------------------------------------------------------------------------------------------------------------------------------------------------------------------------------|
| Population characteristics | <input type="text" value="Human liver grafts declined for transplantation. The donor and grafts details were provided in Supplementary Table 1."/>                               |
| Recruitment                | <input type="text" value="Ten human livers were obtained for research after being declined for transplantation nationwide, and the consent was obtained from the next of kin."/> |
| Ethics oversight           | <input type="text" value="The local ethics committee of Canton of Zurich approved the study protocol (2017-000412)."/>                                                           |

Note that full information on the approval of the study protocol must also be provided in the manuscript.
